# Supplementary material for: Enhanced enantioseparation of drugs by capillary electrochromatography with a l-cysteine functionalized gold nanoparticle based stationary phase
Source: Royal Society of Chemistry journal article supplement (doi:10.1039/d2ay00414c), 2022-01-01
Supplement: d2ay00414c1.pdf [file d2ay00414c1.pdf]

Supporting Information

**Enhanced enantioseparation of drugs by capillary electrochromatography with L-cysteine functionalized gold nanoparticles based stationary phase**

Pandeng Miao<sup>a, b†</sup>, Ying Xi<sup>a, b†</sup>, Zijie Feng<sup>a, b</sup>, Jian Zhang<sup>a, b</sup>, Yingxiang Du<sup>a, b\*</sup>, Cheng Chen<sup>a, b</sup>

<sup>a</sup> Key Laboratory of Drug Quality Control and Pharmacovigilance (Ministry of Education), China Pharmaceutical University, Nanjing 210009, P. R. China.

<sup>b</sup> State Key Laboratory of Natural Medicines, China Pharmaceutical University, Nanjing 210009, P. R. China.

# Pandeng Miao and Ying Xi contributed equally to this work.

\***Correspondence:** Professor Yingxiang Du, China Pharmaceutical University, No.24 Tongji Xiang, Nanjing, Jiangsu 210009, China. **E-mail:** du\_yingxiang@126.com. ORCID iD: 0000-0001-6747-5607.

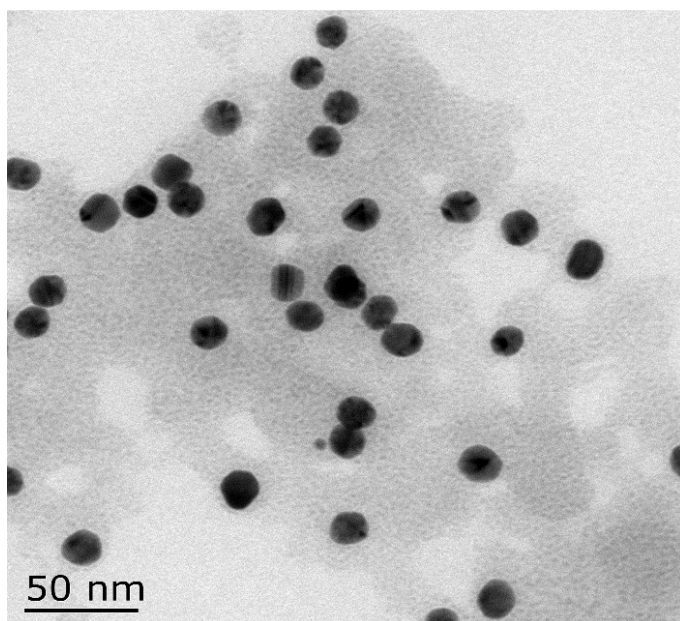

Figure S1 Transmission electron microscopy images of GNPs.

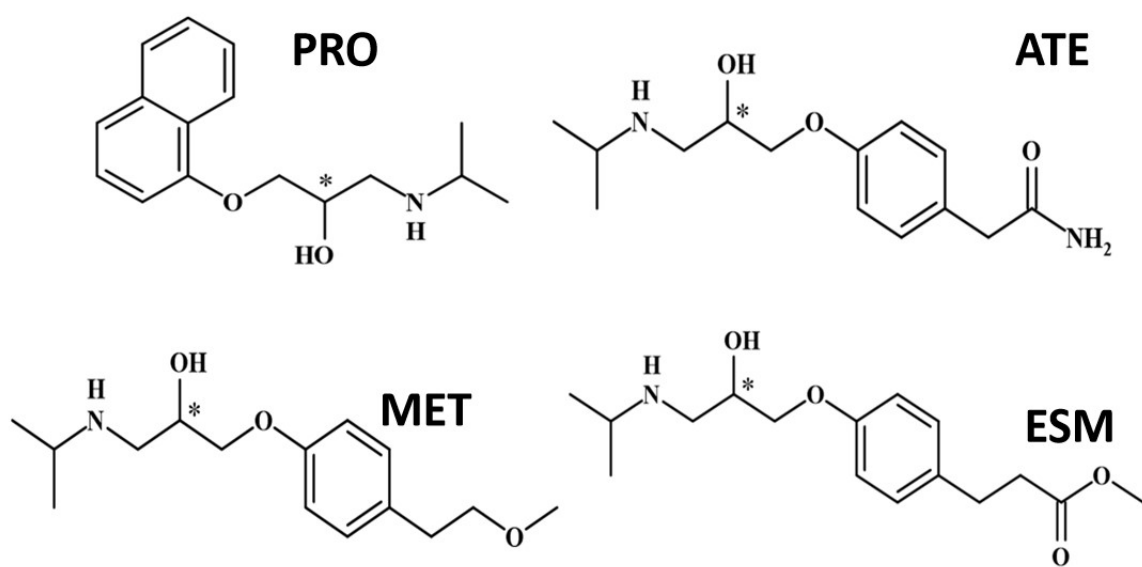

Figure S2 Structures of four analytes

---

Table S1 Element analyses of bare capillary and L-Cys-GNP-GMA@capillary column by EDS.

| element       | Bare capillary<br>column |       |       |    |   | L-Cys-GNP-GMA@capillary<br>column |       |       |       |      |
|---------------|--------------------------|-------|-------|----|---|-----------------------------------|-------|-------|-------|------|
|               | C                        | Si    | O     | Au | S | C                                 | Si    | O     | Au    | S    |
| Atom(%)       | 9.45                     | 39.9  | 50.65 | 0  | 0 | 53.09                             | 14.93 | 19.49 | 10.78 | 1.71 |
| Element(wt.%) | 5.55                     | 54.83 | 39.62 | 0  | 0 | 17.18                             | 11.30 | 8.40  | 61.52 | 1.61 |

Table S2 Chiral separation of tested drugs in different columns.

| Drugs | Bare capillary column                |            | L-Cys-GNP-APTES@ capillary column    |            | L-Cys-GNP-GMA@ capillary column      |            |
|-------|--------------------------------------|------------|--------------------------------------|------------|--------------------------------------|------------|
|       | t <sub>1</sub> /t <sub>2</sub> (min) | Rs/α       | t <sub>1</sub> /t <sub>2</sub> (min) | Rs/α       | t <sub>1</sub> /t <sub>2</sub> (min) | Rs/α       |
| PRO   | 16.420/16.744                        | 1.27/1.020 | 31.404/32.603                        | 2.49/1.038 | 22.504/24.088                        | 2.91/1.070 |
| ATE   | 16.874/17.168                        | 1.31/1.017 | 33.243/34.537                        | 2.21/1.039 | 22.133/23.707                        | 3.19/1.071 |
| MET   | 16.371/16.672                        | 1.42/1.018 | 31.913/33.141                        | 2.49/1.038 | 21.645/23.162                        | 3.16/1.070 |
| ESM   | 16.599/16.866                        | 1.27/1.016 | 32.214/33.468                        | 2.24/1.039 | 22.580/24.074                        | 2.93/1.066 |

Conditions : fused-silica capillary, L-Cys-GNP-APTES@capillary, L-Cys-GNP-GMA@capillary, 50 cm (41.5 cm effective length) ×75μm id; BGE, 40 mM borax buffer (40% methanol, v/v) containing 120 mM LA; pH 3.0 ; capillary temperature, 20 °C; applied voltage, 16 kV.

Table S3 Effect of buffer pH on enantiomeric separation

| Drugs | Buffer pH                                |       |                                          |       |                                          |       |                                          |       |                                          |       |
|-------|------------------------------------------|-------|------------------------------------------|-------|------------------------------------------|-------|------------------------------------------|-------|------------------------------------------|-------|
|       | 6.5                                      |       | 7.0                                      |       | 7.5                                      |       | 8.0                                      |       | 8.5                                      |       |
|       | t <sub>1</sub> / t <sub>2</sub><br>(min) | Rs/α  |
| PRO   | 22.404/                                  | 0.71/ | 21.971/                                  | 1.97/ | 22.504/                                  | 2.91/ | 22.817/                                  | 2.81/ | 23.161/                                  | 2.63/ |
|       | 23.173                                   | 1.034 | 23.044                                   | 1.049 | 24.088                                   | 1.070 | 24.348                                   | 1.067 | 24.752                                   | 1.069 |
| ATE   | 22.214/                                  | 1.08/ | 22.318/                                  | 2.07/ | 22.133/                                  | 3.19/ | 22.103/                                  | 2.85/ | 23.453/                                  | 2.77/ |
|       | 22.687                                   | 1.021 | 23.187                                   | 1.043 | 23.707                                   | 1.071 | 23.753                                   | 1.075 | 24.932                                   | 1.063 |
| MET   | 21.509/                                  | 1.16/ | 21.782/                                  | 2.06/ | 21.645/                                  | 3.16/ | 21.232/                                  | 2.81/ | 22.326/                                  | 2.61/ |
|       | 22.007                                   | 1.023 | 22.738                                   | 1.044 | 23.162                                   | 1.070 | 22.955                                   | 1.081 | 23.767                                   | 1.065 |
| ESM   | 22.645/                                  | 0.98/ | 22.721/                                  | 1.94/ | 22.580/                                  | 2.93/ | 22.407/                                  | 2.75/ | 23.324/                                  | 2.63/ |
|       | 23.061                                   | 1.019 | 23.602                                   | 1.041 | 24.074                                   | 1.066 | 23.920                                   | 1.068 | 25.432                                   | 1.090 |

**Conditions:** applied voltage, 16 kV; BGE, 40 mM borax buffer (40% methanol, v/v) containing 120 mM LA; buffer pH, 6.5-8.5; other conditions as in Table S2.

Table S4 Effect of lactobionic acid concentration on enantiomeric separation

| Drugs | LA concentration(mM) |          |      |          |      |          |      |          |      |          |
|-------|----------------------|----------|------|----------|------|----------|------|----------|------|----------|
|       | 75                   |          | 90   |          | 105  |          | 120  |          | 135  |          |
|       | Rs                   | $\alpha$ | Rs   | $\alpha$ | Rs   | $\alpha$ | Rs   | $\alpha$ | Rs   | $\alpha$ |
| PRO   | 1.64                 | 1.034    | 2.20 | 1.056    | 2.64 | 1.066    | 2.91 | 1.070    | 2.75 | 1.068    |
| ATE   | 1.58                 | 1.032    | 2.47 | 1.053    | 2.79 | 1.068    | 3.15 | 1.071    | 2.84 | 1.070    |
| MET   | 1.53                 | 1.034    | 2.36 | 1.055    | 2.51 | 1.065    | 3.16 | 1.070    | 2.80 | 1.067    |
| ESM   | 1.28                 | 1.030    | 2.11 | 1.055    | 2.34 | 1.067    | 2.93 | 1.066    | 2.73 | 1.064    |

**Conditions:** applied voltage, 16 kV; BGE, 40 mM borax buffer (40% methanol, v/v) containing 75-135 mM LA; buffer pH, 7.5; other conditions as in Table S2.

Table S5 reproducibility data for L-Cys-GNP-APTES@capillary and L-Cys-GNP-GMA@capillary

|                           | L-Cys-GNP-APTES@capillary (RSD/ %) |                |                | L-Cys-GNP-GMA@capillary (RSD/ %) |                |                |
|---------------------------|------------------------------------|----------------|----------------|----------------------------------|----------------|----------------|
|                           | Rs                                 | t <sub>1</sub> | t <sub>2</sub> | Rs                               | t <sub>1</sub> | t <sub>2</sub> |
| Intraday (n=6)            | 3.2                                | 3.5            | 3.5            | 3.0                              | 3.5            | 3.8            |
| Interday (n=9)            | 4.4                                | 3.3            | 3.1            | 3.9                              | 3.6            | 3.2            |
| Column-to-column<br>(n=9) | 4.2                                | 4.0            | 3.8            | 4.5                              | 4.7            | 4.1            |
| Interbatch (n=9)          | 4.9                                | 5.2            | 5.1            | 4.3                              | 5.0            | 4.9            |

Conditions : L-Cys-GNP-APTES@capillary, L-Cys-GNP-GMA@capillary, 50 cm (41.5 cm effective length)

×75µm id; BGE, 40 mM borax buffer (40% methanol, v/v) containing 120 mM LA; pH 3.0 ; capillary temperature, 20 °C; applied voltage, 16 kV.
